## Prediction of severe COVID-19 cases requiring intensive care in Osaka, Japan

### **Authors:**

Junko Kurita <sup>1)</sup>, Tamie Sugawara<sup>2)</sup>, Yasushi Ohkusa<sup>2)</sup>

### **Affiliation:**

1) Department of Nursing, Tokiwa University, Ibaraki, Japan

2) National Institute of Infectious Diseases, Tokyo, Japan

**Corresponding author:** Junko Kurita      kuritaj@tokiwa.ac.jp

**Keywords:** COVID-19, medical exhaustion, prediction, severe case, intensive care unit

## Summary

**Background:** To avoid exhaustion of medical resources by COVID-19 care, policy-makers must predict care needs, specifically estimating the proportion of severe cases likely to require intensive care. In Osaka prefecture, Japan, the number of these severe cases exceeded the capacity of ICU units prepared for COVID-19 from mid-April, 2021.

**Objective:** This study used a statistical model to elucidate dynamics of severe cases in Osaka and validated the model through prospective testing.

**Methods:** The study extended from April 3, 2020 through April 26, 2021 in Osaka prefecture, Japan prefecture. We regressed the number of severe cases on the number of severe cases the day prior and the newly onset patients of more than 21 days prior.

**Results:** We selected the number of severe cases the day prior and the number of newly onset patients on 21 and 28 days prior as explanatory variables for explaining the number of severe cases based on the adjusted determinant coefficient. The adjusted coefficient of determination was greater than 0.995 and indicated good fit. Prospective out of sample three-week prediction forecast the peak date precisely, but the level was not t.

Discussion and Conclusion: A reason for the gap in the prospective prediction might be the emergence of variant strains.

1 Introduction

2        Since mid-April, the number of severe cases in Osaka prefecture, Japan, with its 8.8  
3 million residents, exceeded the intensive care unit (ICU) capacity prepared for  
4 COVID-19 patients. As shown in Figure 1, the maximum capacity was 365 beds on  
5 May 5 and 6, 2021. Prospective estimation of the number of severe cases is necessary to  
6 plan and activate countermeasures. Actually, at least one researcher used a simple  
7 exponentially increasing figure to predict 500 severe cases by the end of April on April  
8 14 [1]. Although its validity was not evaluated, 500 severe cases represent more than  
9 twice the capacity for it. Therefore, the present study examines provision of the  
10 prediction model and its validity.

11

12 Methods

13        Severe cases of COVID-19 were defined as requiring ICU admission. The study  
14 period extended from April 3, 2020 to April 26, 2021. Out of sample prediction was  
15 performed for three weeks of April 27 through May 17, 2021. The study area was Osaka  
16 prefecture in Japan.

17 We regressed the number of severe cases on the lagged number of severe cases and  
18 the newly onset patients reported more than 21 days prior. Then we selected a formula  
19 maximizing the adjusted coefficient of determination.

20 The study area was Osaka prefecture. The daily newly confirmed cases and  
21 information about severe cases in Osaka were published by the Osaka prefectural  
22 government [2]. Epidemic curves, which are newly onset patients by onset date, were  
23 calculated through empirical distribution of the incubation period and the reporting  
24 delay from onset to reporting, similarly to earlier studies [3, 4].

25 Finally, to evaluate the model's predictive power, we performed out of sample  
26 forecasting prospectively for three weeks from April 26, 2021 until May 17, 2021,  
27 fixing the parameters as estimated. Evaluation measures for the precision of prediction  
28 were correlation coefficients and discrepancy rates, which were defined as the  
29 percentage of the average of the absolute difference between the observed and the  
30 predicted, divided by the observed, weighted by the observed [6]. We adopted 5% as the  
31 significance level.

32

33 Ethical considerations

34 All information used for this study was published by the Osaka prefectural

35 government [2]. Therefore no ethical issue was posed by the procedures used to conduct  
36 this study.

37

## 38 Results

39 In Osaka, we observed 76,483 COVID-19 patients severe cases and 29,894 severe  
40 cases day up through April 26, 2021. Figure 1 depicts severe cases and newly onset  
41 patients each day. Severe cases fluctuate with a lag after the number of onset patients.  
42 Table 1 presents the estimation results. Based on adjusted coefficients of determination,  
43 we selected the model with the number of severe cases the day prior and the number of  
44 newly onset patients 21 and 28 days prior. Its adjusted coefficient of determination was  
45 higher than 0.995. Figure 2 depicts the observed and fitted numbers of severe cases. It is  
46 apparent that these were almost mutually equal.

47 Figure 3 depicts out of sample three-week forecasting prospectively for 21 days  
48 from April 26, 2021. The observed peak was May 4, 2021, but the peak in forecasting  
49 was April 30, 2021. Although there were some gaps between the two dates, because the  
50 observed and predicted values were almost flat for a few days before and after, the  
51 model can predict the peak date about one week prior. Nevertheless, the peak was not  
52 predicted precisely. Prediction was far less than the observed value as time progressed.

53 Actually, correlation coefficients were 0.494, which was inferred as significant. The  
54 discrepancy rate was 19.52%. If the length of prediction is shortened from three weeks,  
55 then these numbers were -0.063 and 13.8%. These were 0.965 and 8.95%.

## 56 Discussion

57 Many mathematical models have been applied to the outbreak of COVID-19  
58 worldwide [3–5]. Unfortunately, these have not succeeded in explaining the course of  
59 COVID-19 outbreaks with several peaks and fluctuations. Even in Osaka, estimation  
60 based on a mathematical model yielded overestimations by more than 40% [1].  
61 Especially in Japan, four peaks were experienced through the end of April, as shown in  
62 Figure 1. The first peak was that of earlier April. The second one was at the end of July.  
63 The first peak might explain the mathematical model with restrictions against  
64 excursions from home [6] because, since mid-March, the rate of going out declined, as  
65 shown in Apple data. However, the second and additional peaks were inexplicable if  
66 using the simple mathematical model. Herd immunity, of course, was not achieved. No  
67 lock-down was activated in Japan at all. Probably, the “new normal” lifestyle with  
68 mask-wearing, social distancing, and restrictions against numerous dining or night-life  
69 establishments became common.

70 Actually, from late July to the end of December, the government encouraged

71 domestic travel. It promoted the spread of the outbreak. However, the outbreak was  
72 contained in August. Therefore, to date, no mathematical model has been sufficient to  
73 explain the outbreak in Japan. The policy for severe cases cannot be discussed using  
74 mathematical models.

75 Instead, we used a statistical model. It might always show some association of  
76 variables for which there is no causality. We showed clear association among severe  
77 cases and patients who had experienced onset 21 days prior.

78 We used no information before  $t-21$ . Reporting was usually delayed from onset up  
79 to 31 days [3, 4]. Therefore, the number of newly onset patients at the same day was  
80 that which was usually developed dynamically for at least two weeks. Because  
81 information of the final two weeks before the estimate is unreliable, we ignored  
82 information during the final two weeks of the study period. Moreover, because the  
83 epidemic curve changes gradually, information related to day  $t$  is correlated closely with  
84 information related to day  $t-1$ . Therefore, we used no information related to consecutive  
85 days. We used the number of newly onset patients with 21 and 28 days prior as  
86 explanatory variables.

87 Prospective out of sample forecasting in Figure 3 shows good fit. Especially, the  
88 peak date was predicted precisely. However, the number of cases at that peak cannot not



89 be predicted precisely. Correlation coefficients for three week prediction were not high.  
90 The peak was found to be the second week. Therefore, correlation for the two-week  
91 prediction was negative and not significant. The discrepancy rate was also not small.  
92 Even for the first week, it was only about 9%. Therefore, we cannot evaluate that the  
93 model is able to predict the level of severe cases.

94 A potential reason might be the variant strain. It emerged in March, 2021 and  
95 spread in April [8]. Even though the study period included these days, the model mainly  
96 reflected the original strain comparison with the variant strain. Therefore, the gap within  
97 which the model cannot be predicted might be caused by higher pathogenies in the  
98 variant strain than in the original strain.

99 Some limitations might have affected this study. First, we used dummy variables  
100 after June to ascertain the disease's decreasing severity. However, we do not understand  
101 the reason why that decreasing severity occurred at that time. That diminished severity  
102 might be attributable to COVID-19 virus mutation. Alternatively, treatment for patients  
103 might have improved since June. Younger and therefore milder patients accounted for a  
104 larger proportion of the patients than before June. Moreover, the disease severity can be  
105 expected to decrease if a new drug were developed. Alternatively, it might increase if  
106 some mutation were to strengthen its pathogenicity. Severity should be monitored to

107 improve the fit of the statistical model.

108 Secondly, definitions of severe cases differed among prefectures, even in Japan.

109 Moreover, they probably varied among countries. It remains unknown whether the  
110 approach used for the present study is applicable to prefectures other than Osaka or to  
111 other countries with other definitions of severity. The robustness of usefulness of the  
112 statistical model must be verified for other areas in Japan and other countries.

113 Thirdly, we might specifically examine only elderly patients or patients older than  
114 50 as explanatory variables. Exploration of that point remains as a challenge for future  
115 research efforts.

116 Fourthly, Osaka has experienced higher severity than Tokyo. In actuality, on April  
117 26, 2021, Osaka had 306 severe cases, with only 55 severe cases reported among  
118 Tokyo's 13 million residents. Therefore, the proportion of severe cases per capita in  
119 Osaka was 8.2 times greater than in Tokyo. Of course, this proportion fluctuates daily,  
120 but this great difference must be investigated to elucidate Osaka situations of the severe  
121 cases. Difference in the prevalence of variant strain with mutation at N501Y or E484K  
122 between the two areas might lead to differences in severity. Alternatively, differences in  
123 the situations of underlying diseases or countermeasures might explain the difference.  
124 Resolving this difficulty is anticipated as our next challenge.

125

## 126 Conclusion

127 Results demonstrated that the model can predict the peak date very well. However,  
128 quantitative prediction of the number of severely ill infected persons was much lower  
129 than the observed level. The present study is based on the authors' opinions. Its results  
130 do not reflect any stance or policy of their professionally affiliated bodies.

131

## 132 Acknowledgments

133 We acknowledge the great efforts of all staff at public health centers, medical  
134 institutions, and other facilities who are fighting the spread and destruction associated  
135 with COVID-19. This study represents the authors' opinion. It does not reflect any  
136 stance of our affiliation.

137

## 138 Competing Interest

139 No author has any conflict of interest, financial or otherwise, to declare in relation  
140 to this study.

141

142

143 Reference

- 144 1) Nippon Housou Kyoukai. Prof. Nishiura of Kyoto university estimated that the  
145 number of severe cases in Osaka prefecture be higher than 500 at the end of April  
146 and required urgent response .  
147 <https://www3.nhk.or.jp/news/html/20210415/k10012976211000.html>. (in  
148 Japanese)[accessed on May 24, 2021]
- 149 2) Osaka Prefectural Government. The Situation of Monitored Items in Osaka Model.  
150 [http://www.pref.osaka.lg.jp/iryo/osakakansensho/corona\\_model.html](http://www.pref.osaka.lg.jp/iryo/osakakansensho/corona_model.html) (in Japanese)  
151 [accessed on April 29, 2021]
- 152 3) Kurita J, Sugawara T, Ohkusa Y. Estimated effectiveness of school closure and  
153 voluntary event cancellation as COVID-19 countermeasures in Japan. J Infect  
154 Chemother 2020 Aug 19;S1341-321X(20)30292-0. doi:  
155 10.1016/j.jiac.2020.08.012.
- 156 4) Sugishita Y, Kurita J, Sugawara T, Ohkusa Y. Effects of voluntary event  
157 cancellation and school closure as countermeasures against COVID-19 outbreak in  
158 Japan. Plos one 2020. <https://doi.org/10.1371/journal.pone.0239455>
- 159 5) Kucharski AJ, Russell TW, Diamond C, Liu Y, Edmunds J, Funk S, Eggo RM;  
160 Centre for Mathematical Modelling of Infectious Diseases COVID-19 working

- 161 group. Early dynamics of transmission and control of COVID-19: a mathematical  
162 modelling study. *Lancet Infect Dis* 2020 ;20:553-8.
- 163 6) Sugawara T, Ohkusa Y, Kawanohara H, Kamei M. Short Term Prediction of  
164 Infectious Diseases Patients from Prescription Surveillance. *Journal of Biosciences  
165 and Medicines* 2018. 6: 61-8.
- 166 7) Kurita J, Sugishita Y, Sugawara T, Ohkusa Y. Mobility data can reveal the entire  
167 COVID1-19 outbreak course in Japan. *JMIR Public Health & Surveillance* 2021,7.  
168 <https://publichealth.jmir.org/2021/2/e20335>
- 169 8) Kurita J, Sugawara T, Ohkusa Y. [Estimating SARS-CoV-2 variant strain  
170 infectiousness in Japan as of March 28, 2021](#). medRxiv 2021.04.11.21255283;  
171

1 Table 1: Estimation results for the number of severe cases

| Explanatory variable                   | Estimated coefficient | <i>p</i> -value | Estimated coefficient | <i>p</i> -value | Estimated coefficient | <i>p</i> -value | Estimated coefficient | <i>p</i> -value | Estimated coefficient | <i>p</i> -value |
|----------------------------------------|-----------------------|-----------------|-----------------------|-----------------|-----------------------|-----------------|-----------------------|-----------------|-----------------------|-----------------|
| constant                               | 16.4607               | .000            | 0.1430                | .646            | 0.1783                | .564            | -0.19874              | .568            | 0.1903                | .544            |
| Lag of the number of severe cases      |                       |                 |                       |                 |                       |                 |                       |                 |                       |                 |
| <i>t</i> -1                            |                       |                 | 1.0185                | .000            | 1.1426                | .000            | 0.99658               | .000            | 1.0295                | .000            |
| <i>t</i> -2                            |                       |                 |                       |                 | -0.1298               | .019            |                       |                 |                       |                 |
| Lag of the number of newly onset cases |                       |                 |                       |                 |                       |                 |                       |                 |                       |                 |
| <i>t</i> -21                           | 0.4079                | .000            | 0.0319                | .000            | 0.0292                | .000            | 0.00859               | .070            | 0.0196                | .040            |
| <i>t</i> -28                           | 0.0686                | .005            | -0.0427               | .000            | -0.0370               | .000            |                       |                 | -0.0249               | .068            |
| <i>t</i> -35                           |                       |                 |                       |                 |                       |                 |                       |                 | -0.0123               | .163            |
| Number of observations                 | 361                   |                 | 361                   |                 | 361                   |                 | 368                   |                 | 354                   |                 |
| Adjusted <i>R</i> <sup>2</sup>         | 0.8957                |                 | 0.9971                |                 | 0.9971                |                 | 0.9962                |                 | 354                   |                 |

2 Note: Rows with “*t*-1” or “*t*-2” show the estimated coefficients and *p*-values for the  
3 number of severe cases yesterday or the day before yesterday. Row with “*t*-21,” “*t*-28”,  
4 and “*t*-35” respectively show the estimated coefficients and *p*-values for the number of  
5 newly onset patients 21, 28, and 35 days prior. Based on adjusted coefficients of  
6 determination, we selected the model with one day lag of the number of severe case and  
7 the number of newly onset patients at 21 and 28 days prior.

- 1 Figure 1: Epidemic curve of the symptomatic confirmed cases and number of severe
- 2 cases in Osaka, April 3, 2020 – April 26, 2021.
- 3 (number of patients)

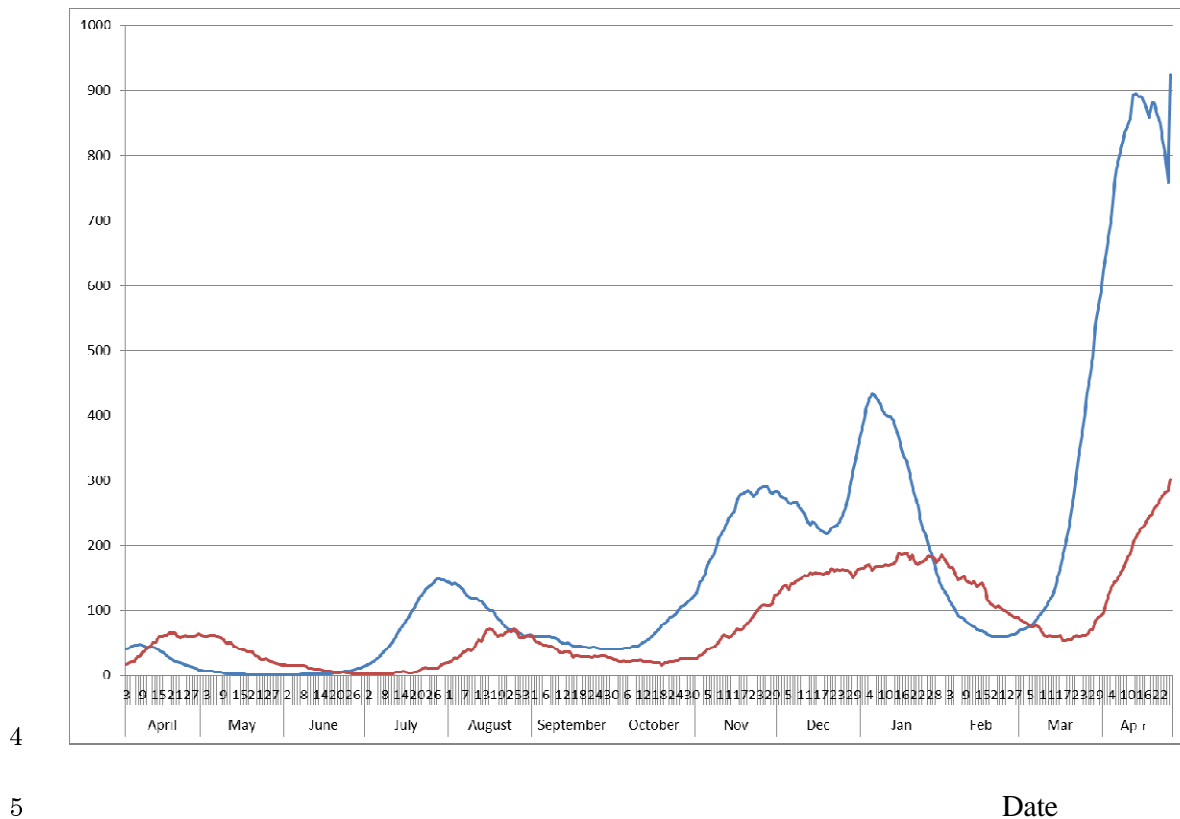

- 6 Notes: The blue line represents the epidemic curve of the symptomatic confirmed cases
- 7 on the onset date. The red line represents the number of severe cases.

- 1 Figure 2: Estimated and observed number of severe cases in Osaka, April 3, 2020 –
- 2 April 26, 2021. (number of patients)

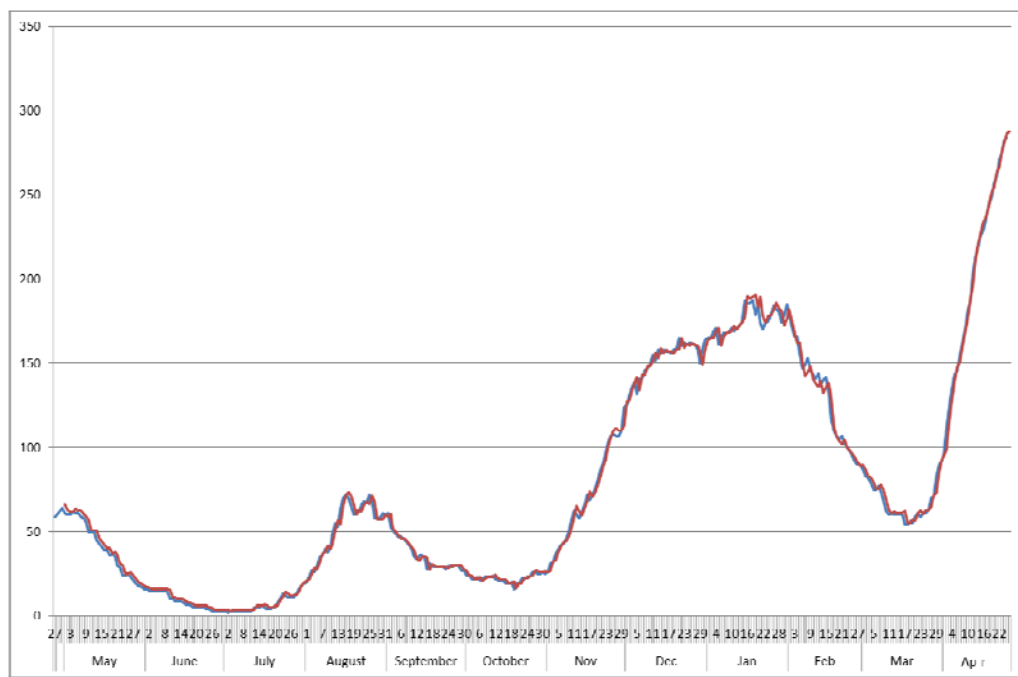

3

4

Date

- 5 Note: The blue line shows the observed number of severe cases. The red line represents
- 6 the estimated number of severe cases.



1 Figure 3: Observed data of severe cases and its forecasting as of April 26, 2021.

2 (number of patients)

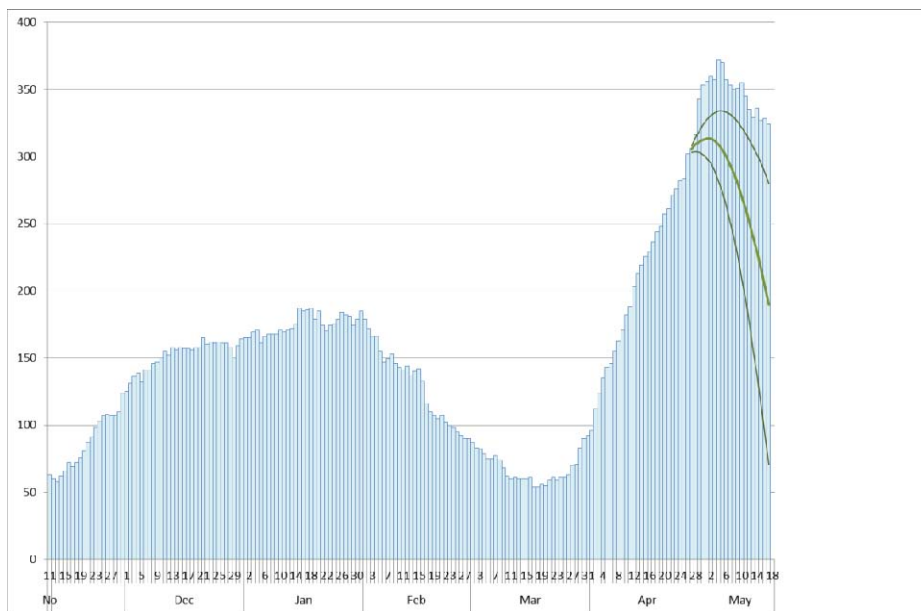

3

4

Date

5 Notes: Bars represent data of severe cases observed daily in Osaka from December 3,

6 2020. The bold line represents a forecast based on estimation results presented in Table

7 1. Thin lines represent its 95% CI.
